# Supplementary material for: Micelle formation of poly(ethylene oxide-b-sodium 2-(acrylamido)-2-methyl-1-propane sulfonate-b-styrene) and its interaction with dodecyl trimethyl ammonium chloride and dibucaine
Source: Royal Society of Chemistry journal article supplement (doi:10.1039/b9py00231f), 2009-12-24
Supplement: b9py00231f.pdf [file b9py00231f.pdf]

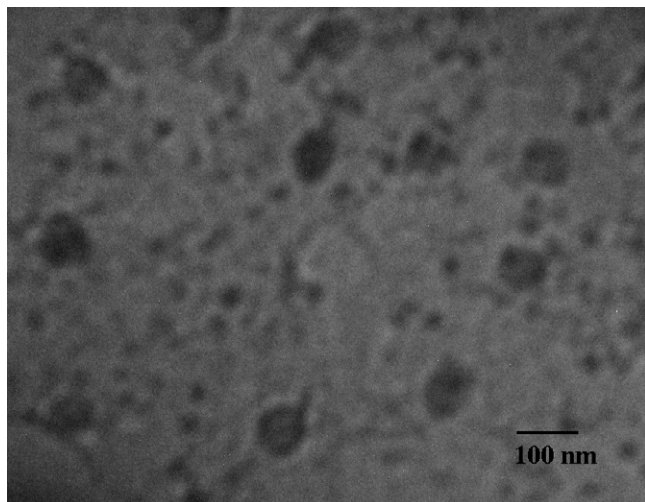

**Figure S1.** TEM image of PEO-*b*-PAMPS-*b*-PS micelles. The sample for the TEM measurement was prepared from the solution in which the concentration of polymer is 1 gL<sup>-1</sup>. The micelles were stained by Fe<sup>3+</sup> ions. The large particles with a diameter of approximately 70 nm correspond to the micelles, while the small particles with a diameter of approximately 20 nm correspond to the flocks of Fe<sup>3+</sup> ions
